# Supplementary material
Source: Springer Nature journal article supplement (https://www.springermedizin.de/resource/supplementary/12943_2014_1463_MOESM3_ESM.pdf/9553068)

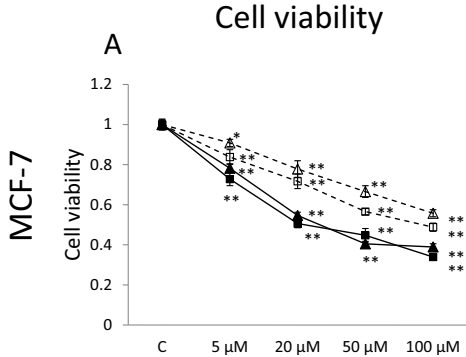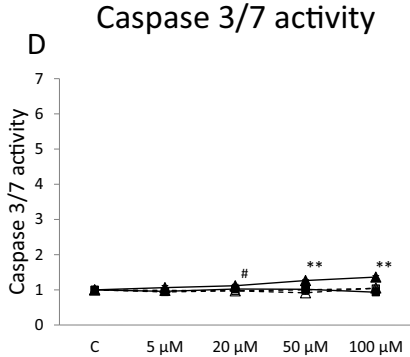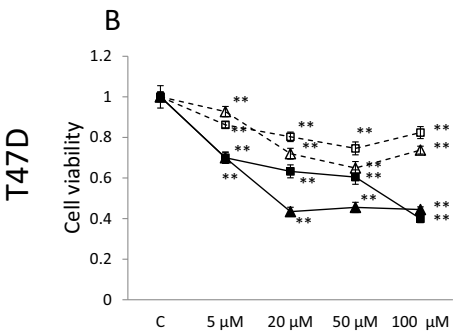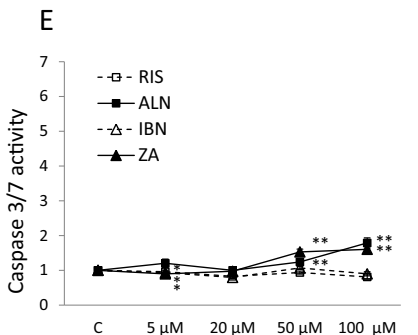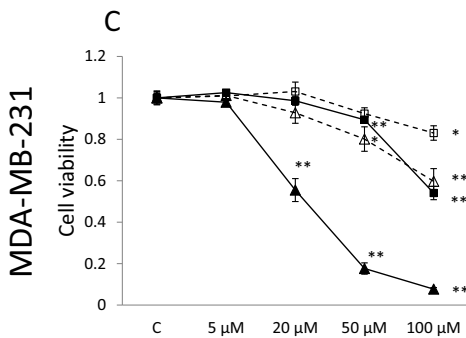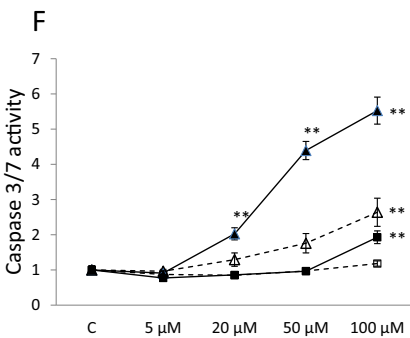

Supplement: MOESM3 [file 9553068]
